# Supplementary material for: Isolation, dynamic NMR study and X-ray characterisation of a bis sulfonium zirconocene-ate dimer
Source: Royal Society of Chemistry journal article supplement (doi:10.1039/b312954c), 2004-01-01

## SUPPORTING INFORMATION

# Isolation, dynamic NMR study and X-ray characterisation of a bis sulfonium zirconocene-ate dimer.

**Esteban Ortega,<sup>a</sup> Nadine Pirio,<sup>a</sup> Philippe Meunier<sup>a\*</sup> and Bruno Donnadiou<sup>b</sup>**

<sup>a</sup> *Laboratoire de Synthèse et Electrosynthèse Organométalliques associé au CNRS (UMR5188), Faculté des Sciences Gabriel, 6 bd Gabriel, 21000 Dijon, France.*

*\* Fax: +33(0)380396100; Tel: +33(0)380396105*

*E-mail: Philippe.Meunier@u-bourgogne.fr*

<sup>b</sup> *Laboratoire de Chimie de Coordination du CNRS, 205 route de Narbonne, 31077 Toulouse, France.*

## Experimental Section

**General Remarks:** Experiments were conducted under a dry argon atmosphere with standard Schlenk techniques. Solvents were freshly distilled under argon from solutions of NaK<sub>2.8</sub>/benzophenone (pentane, THF), NaK<sub>2.8</sub> (toluene, C<sub>6</sub>D<sub>6</sub>, toluene-*d*<sub>8</sub>), or CaH<sub>2</sub> (CH<sub>2</sub>Cl<sub>2</sub>, CD<sub>2</sub>Cl<sub>2</sub>). Reagents were purchased from commercial suppliers and used without further purification, except for the thiols which were distilled and stored under an argon atmosphere. Diphenylphosphinoacetylene<sup>(1)</sup> and dimethylzirconocene<sup>(2)</sup> were prepared according to literature procedures. Nuclear magnetic resonance (NMR) spectra were recorded on Bruker DRX-500 spectrometer by the C.S.M. (Centre de Spectrométrie Moléculaire) of the Université de Bourgogne. Chemical shifts are reported in ppm relative to SiMe<sub>4</sub> (<sup>1</sup>H; <sup>13</sup>C) or H<sub>3</sub>PO<sub>4</sub> (<sup>31</sup>P). <sup>13</sup>C NMR assignments were confirmed by inverse gradient  $\delta$  <sup>1</sup>H-<sup>13</sup>C HMQC and  $\delta$  <sup>1</sup>H-<sup>13</sup>C HMBC. Combustion analyses were performed by the analytical service of L.S.E.O. of the Université de Bourgogne.

### Preparation of complexes **1a,b**

To a solution of dimethylzirconocene (1.20 g; 4.8 mmol) in toluene (20 mL) was added diphenylphosphinoacetylene (1.00 g; 4.8 mmol) followed by a stoichiometric amount of phenyl-methanethiol (for **1a**: 0.56 mL; 4.8 mmol) or (4-methoxy-phenyl)-methanethiol (for **1b**: 0.67 mL; 4.8 mmol). The resulting solution was stirred for 2 h at room temperature then it was heated at 90 °C for 10 h. A beige solid precipitated during the reaction. The mixture was cooled to room temperature and was concentrated in *vacuo*, then pentane (40 mL) was added. The resulting solid product was washed with 5 X 10 mL of pentane and *vacuum* dried.

**1a** (both diastereomers): yield 1.62 g (61 %), beige powder

<sup>1</sup>H NMR (500 MHz, 300 K, toluene-*d*<sub>8</sub>):  $\delta$  4.47, 4.56 (broad s, 2H, CHPh), 5.56, 5.71, 5.94, 6.08 (s, 10H, Cp), 6.78, 6.85 (dd, 2H,  $J_{HP} = 15.6$  Hz,  $J_{HH} = 2.3$  Hz, =CH), 6.95-7.31 (H<sub>arom</sub>), 7.44 (m, H<sub>arom</sub>), 7.88 (t, H<sub>arom</sub>), 7.92 (t, H<sub>arom</sub>) ppm.

<sup>13</sup>C {<sup>1</sup>H} NMR (125 MHz, 300 K, CD<sub>2</sub>Cl<sub>2</sub>):  $\delta$  66.2, 67.8 (d,  $J_{CP} = 11.0$  Hz, CHPh), 110.2, 110.5, 110.9, 111.3 (d,  $J_{CP} = 3.6$  Hz, Cp), 127.7 (s, C<sub>arom</sub>), 127.8 (d,  $J_{CP} = 7.6$  Hz, C<sub>arom</sub>), 128.0 (s, C<sub>arom</sub>), 128.5-129.3 (m, C<sub>arom</sub>), 133.2 (s, C<sub>arom</sub>), 133.4-133.6 (m, C<sub>arom</sub>), 133.7 (s, C<sub>arom</sub>),

134.9, 135.2 (d,  $J_{CP} = 17.2$  Hz,  $C_{arom}$ ), 135.0, 135.1 (d,  $J_{CP} = 19.0$  Hz,  $iPPh_2$ ), 144.7, 145.1 (s,  $iPh$ ), 154.2, 155.1 (d,  $J_{CP} = 9.2$  Hz,  $=CH$ ), 180.8, 181.8 (d,  $J_{CP} = 92.2$  Hz,  $PC=$ ) ppm.

$^{31}P\{^1H\}$  NMR (202 MHz, 300 K, toluene- $d_8$ ):  $\delta$  -1.4, -1.1 (s) ppm.

Anal. Calcd. for  $C_{62}H_{54}P_2S_2Zr_2$ : C, 67.23; H, 4.91; S, 5.79 %. Found: C, 67.19; H, 5.08; S, 5.75 %.

**1b** (both diastereomers): yield 1.88 g (67 %), beige powder.

$^1H$  NMR (500 MHz, 300 K,  $C_6D_6$ ):  $\delta$  3.28, 3.34 (s, 6H, OMe), 4.52, 4.63 (broad s, 2H,  $CHPh$ ), 5.70, 5.79, 6.00, 6.16 (s, 10H, Cp), 6.79, 6.87 (dd, 2H,  $J_{HP} = 15.4$  Hz,  $J_{HH} = 2.3$  Hz,  $=CH$ ), 6.92-7.34 ( $H_{arom}$ ), 7.51 (m,  $H_{arom}$ ), 7.99 (t,  $H_{arom}$ ) ppm.

$^{13}C\{^1H\}$  NMR (125 MHz, 300 K,  $CD_2Cl_2$ ):\*  $\delta$  55.6, 55.7 (s, OMe), 65.7, 67.1 (d,  $J_{CP} = 11.5$  Hz,  $CHPh$ ), 110.2, 110.5, 110.9, 111.3 (d,  $J_{CP} = 2.3$  Hz, Cp), 128.2 (d,  $J_{CP} = 13.8$  Hz,  $C_{arom}$ ), 128.6 (s,  $C_{arom}$ ), 128.9-129.3 (m,  $C_{arom}$ ), 129.6, 129.9 (d,  $J_{CP} = 19.1$  Hz,  $C_{arom}$ ), 133.2-133.7 (m,  $C_{arom}$ ), 134.3 (s,  $C_{quat}$ ), 134.8-135.3 (m,  $C_{arom}$ ), 154.7, 155.5 (d,  $J_{CP} = 9.2$  Hz,  $=CH$ ) ppm.

\* Some of the  $^{13}C$  NMR signals are not visible due to very low solubility in common deuterated solvents.

$^{31}P\{^1H\}$  NMR (202 MHz, 300 K,  $C_6D_6$ ):  $\delta$  -0.4, -0.3 (s) ppm.

Anal. Calcd. for  $C_{64}H_{58}O_2P_2S_2Zr_2$ : C, 65.83; H, 5.01; S, 5.49 %. Found: C, 65.87; H, 4.87; S, 5.13 %.

### Preparation of mixture of complexes **1a**, **1b** and **1c**

To a solution of **1a** (0.08 g ; 0.07 mmol) in toluene (5 mL) was added a solution of **1b** (0.08 g ; 0.07 mmol) in toluene (5 mL). The resulting solution was heated at 90 °C for some hours (or stirred at room temperature several days), then was *vacuum* dried.

*Scrambling experiment:* To a solution of dimethylzirconocene (0.48 g; 1.9 mmol) in toluene (20 mL) was added diphenylphosphinoacetylene (0.40 g; 1.9 mmol) followed by half equivalent of each of the thiols (phenyl-methanethiol: 0.11 mL; 0.95 mmol, and (4-methoxyphenyl)-methanethiol: 0.13 mL; 0.95 mmol). The resulting solution was stirred for 2 h at room temperature then it was heated at 90 °C for 10 h. A beige solid precipitated during the reaction. The mixture was cooled to room temperature, concentrated in *vacuo* and pentane (40 mL) was added. The resulting solid product was washed with 5 X 10 mL of pentane and was *vacuum* dried.

Characteristic NMR resonances:

$^1\text{H}$  NMR (500 MHz, 300 K,  $\text{C}_6\text{D}_6$ ):  $\delta$  3.27, 3.34 (s, OMe, **1b**), 3.27, 3.33 (s, OMe, **1c**), 4.47, 4.59 (broad s,  $\text{CHPh}$ , **1a**), 4.49, 4.51, 4.61, 4.62 (broad s,  $\text{CHPh}$ , **1c**), 4.52, 4.63 (broad s,  $\text{CHPh}$ , **1b**), 5.63, 5.73, 5.97, 6.13 (s, Cp, **1a**), 5.65, 5.69, 5.75, 5.79, 5.98, 5.99, 6.14, 6.15 (s, Cp, **1c**), 5.71, 5.80, 6.00, 6.17 (s, Cp, **1b**) ppm.

$^{31}\text{P}\{^1\text{H}\}$  NMR (202 MHz, 300 K,  $\text{C}_6\text{D}_6$ ):  $\delta$  -0.59, -0.48 (s, **1a**), -0.54, -0.50, -0.42, -0.29 (s, **1c**), -0.37, -0.27 (s, **1b**) ppm.

### Preparation of complexes **2a,b**

To a suspension of the appropriate bis-zirconocene-ate complex (for **2a**: 0.25 g; 0.23 mmol of **1a**, and for **2b**: 0.25 g; 0.21 mmol of **1b**) in THF (15 mL), was added at room temperature, a large excess of a solution of borane methyl sulfide complex in THF ( $\text{C} = 2 \text{ mol.L}^{-1}$ ) (for **2a,b**: 2 mL; 4 mmol). The reaction mixture was stirred for 2 h, and then evaporated to dryness. The resulting solid was washed by 3 X 10 mL of pentane and *vacuum* dried.

**2a**: yield 0.23 g (86 %), white powder.

$^1\text{H}$  NMR (500 MHz, 300 K,  $\text{C}_6\text{D}_6$ ):  $\delta$  0.10 (broad s,  $\text{BH}_3$ ), 2.10 (broad s,  $\text{BH}_3$ ), 4.12 (dd, 1H,  $J_{\text{HP}} = 5.5 \text{ Hz}$ ,  $J_{\text{HH}} = 1.9 \text{ Hz}$ ,  $\text{CHPh}$ ), 5.45, 6.00 (s, 5H, Cp), 6.78 (dd, 1H,  $J_{\text{HP}} = 27.0 \text{ Hz}$ ,  $J_{\text{HH}} = 1.9 \text{ Hz}$ , =CH), 6.82-7.32 (m,  $\text{H}_{\text{arom}}$ ), 7.62 (m,  $\text{H}_{\text{arom}}$ ), 8.38 (m,  $\text{H}_{\text{arom}}$ ) ppm.

$^{13}\text{C}\{^1\text{H}\}$  NMR (125 MHz, 300 K,  $\text{C}_6\text{D}_6$ ):  $\delta$  64.3 (d,  $J_{\text{PC}} = 27.6 \text{ Hz}$ ,  $\text{CHPh}$ ), 108.5, 110.8 (s, Cp), 127.6, 128.8 (s,  $\text{C}_{\text{arom}}$ ), 129.3 (d,  $J_{\text{PC}} = 9.2 \text{ Hz}$ ,  $\text{C}_{\text{arom}}$ ), 129.4 (s,  $\text{C}_{\text{arom}}$ ), 130.4, 131.5 (d,  $J_{\text{PC}} = 2.2 \text{ Hz}$ ,  $\text{C}_{\text{arom}}$ ), 133.1, 134.3 (d,  $J_{\text{PC}} = 8.6 \text{ Hz}$ ,  $\text{C}_{\text{arom}}$ ), 144.5 (s, *iPh*), 159.4 (d,  $J_{\text{PC}} = 6.3 \text{ Hz}$ , =CH), 172.4 (d,  $J_{\text{PC}} = 22.3 \text{ Hz}$ , PC=) ppm.

$^{31}\text{P}\{^1\text{H}\}$  NMR (202 MHz, 300 K,  $\text{C}_6\text{D}_6$ ):  $\delta$  27.0 (m) ppm.

MS(EI)  $m/z$  566 [ $\text{M}^{+\bullet} - \text{BH}_3$ ].

Anal. Calcd. for  $\text{C}_{31}\text{H}_{33}\text{B}_2\text{PSZr}$ : C, 64.03; H, 5.72; S, 5.51 %. Found: C, 63.58; H, 5.84; S, 5.18 %.

**2b**: yield 0.23 g (88 %), white powder.

$^1\text{H}$  NMR (500 MHz, 300 K,  $\text{C}_6\text{D}_6$ ):  $\delta$  0.13 (broad s,  $\text{BH}_3$ ), 2.03 (broad s,  $\text{BH}_3$ ), 3.23 (s, 3H, OMe), 4.15 (dd, 1H,  $J_{\text{HP}} = 5.0 \text{ Hz}$ ,  $J_{\text{HH}} = 1.8 \text{ Hz}$ ,  $\text{CHPh}$ ), 5.47, 6.01 (s, 5H, Cp), 6.66-6.68 (m,  $\text{H}_{\text{arom}}$ ), 6.79 (dd, 1H,  $J_{\text{HP}} = 27.1 \text{ Hz}$ ,  $J_{\text{HH}} = 1.8 \text{ Hz}$ , =CH), 6.83-7.24 (m,  $\text{H}_{\text{arom}}$ ), 7.64 (m,  $\text{H}_{\text{arom}}$ ), 8.39 (m,  $\text{H}_{\text{arom}}$ ) ppm.

$^{13}\text{C}\{^1\text{H}\}$  NMR (125 MHz, 300 K,  $\text{C}_6\text{D}_6$ ):  $\delta$  55.2 (s, OMe), 64.2 (d,  $J_{\text{PC}} = 26.9$  Hz, CHPh), 108.6, 110.9 (s, Cp), 128.9 (s, *m*Ph), 128.9, 129.4 (d,  $J_{\text{PC}} = 9.6$  Hz, *o*PPh<sub>2</sub>), 130.5 (d,  $J_{\text{PC}} = 2.0$  Hz, *p*PPh<sub>2</sub>), 131.5 (d,  $J_{\text{PC}} = 57.6$  Hz, *i*PPh<sub>2</sub>), 131.6 (s, *o*Ph), 133.2 (d,  $J_{\text{PC}} = 8.6$  Hz, *m*PPh<sub>2</sub>), 134.0 (d,  $J_{\text{PC}} = 44.1$  Hz, *i*PPh<sub>2</sub>), 134.5 (d,  $J_{\text{PC}} = 8.6$  Hz, *m*PPh<sub>2</sub>), 136.8 (s, *i*Ph), 160.0 (s, *i*PhOMe), 160.0 (d,  $J_{\text{PC}} = 6.7$  Hz, =CH), 171.9 (d,  $J_{\text{PC}} = 22.1$  Hz, PC=) ppm.

$^{31}\text{P}\{^1\text{H}\}$  NMR (202 MHz, 300 K,  $\text{C}_6\text{D}_6$ )  $\delta$  27.1 (m) ppm.

MS(EI)  $m/z$  596 [ $\text{M}^{+\bullet} - \text{BH}_3$ ].

Anal. Calcd. for  $\text{C}_{32}\text{H}_{35}\text{B}_2\text{OPSZr}$ : C, 62.85; H, 6.18; S, 5.24 %. Found: C, 63.12; H, 6.01; S, 5.08 %.

### **References:**

1. Charrier, C., Simonnin, M. P., Chodkiewicz, W., and Cadiot, P. (1964) *Compt. Rend.* **258**, 1537-1540.
2. Samuel, E., and Rausch, M. D. (1973) *J. Am. Chem. Soc.* **95**, 6263-6267.

**$^1\text{H}$  NMR Spectrum (500 MHz,  
Tol- $d_8$ , 300 K) of complex 1a**

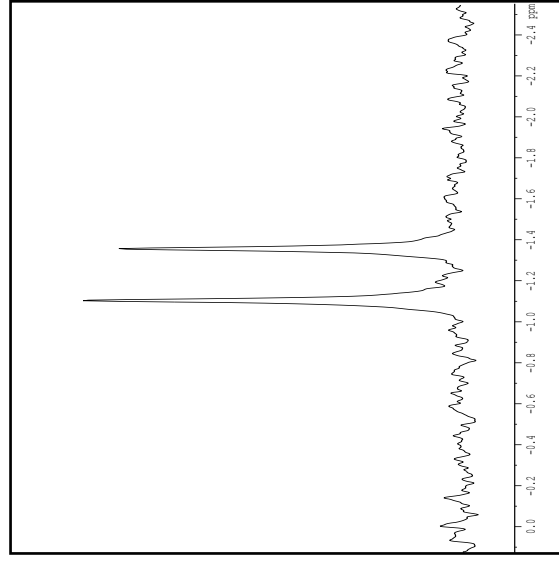

**$^{31}\text{P}\{^1\text{H}\}$  NMR Spectrum (202 MHz,  
 $\text{C}_6\text{D}_6$ , 300 K) of complex 1a**

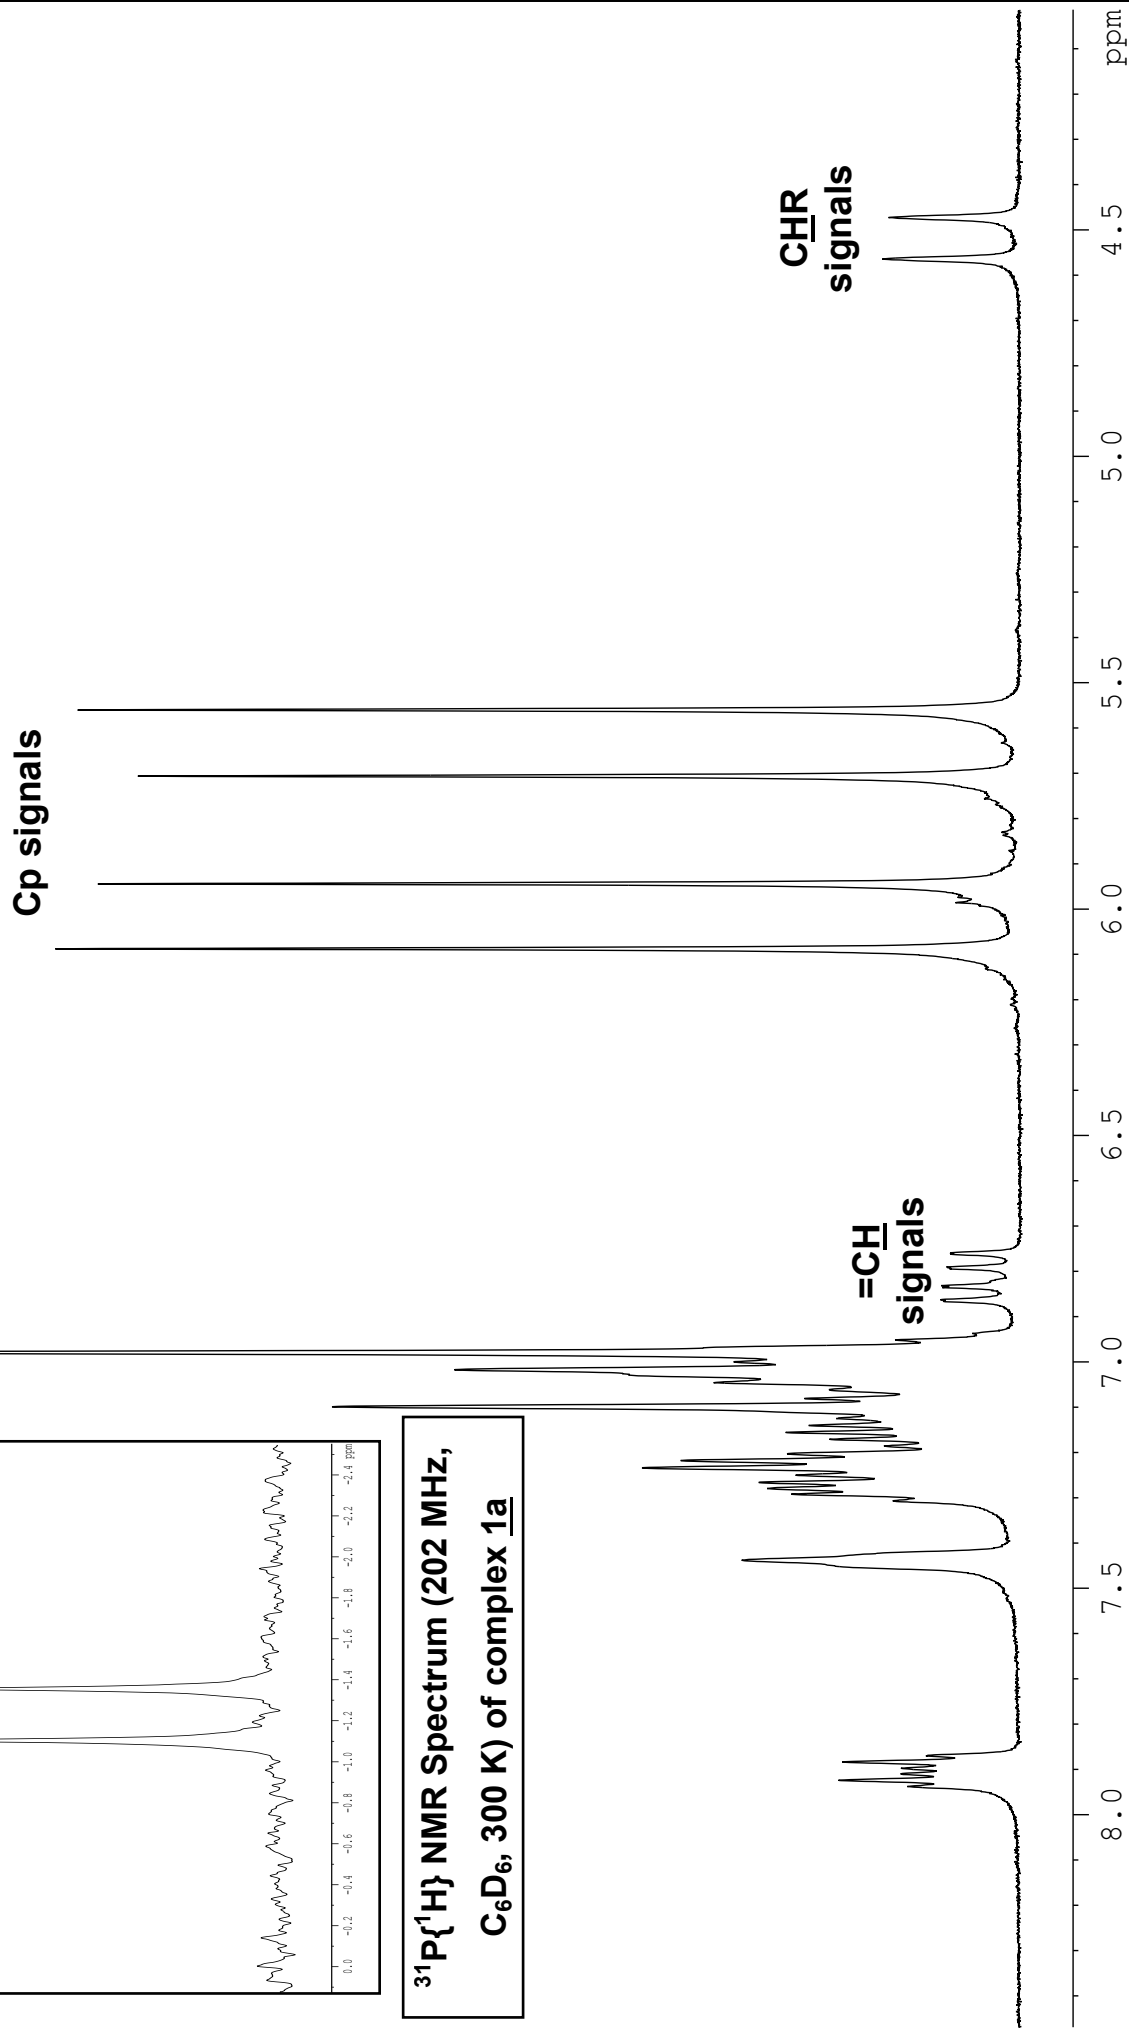

**$^1\text{H}$  NMR Spectrum (500 MHz,  $\text{C}_6\text{D}_6$ , 300 K) of the mixture of complexes : 1a, 1b and 1c**

**Cp signals**

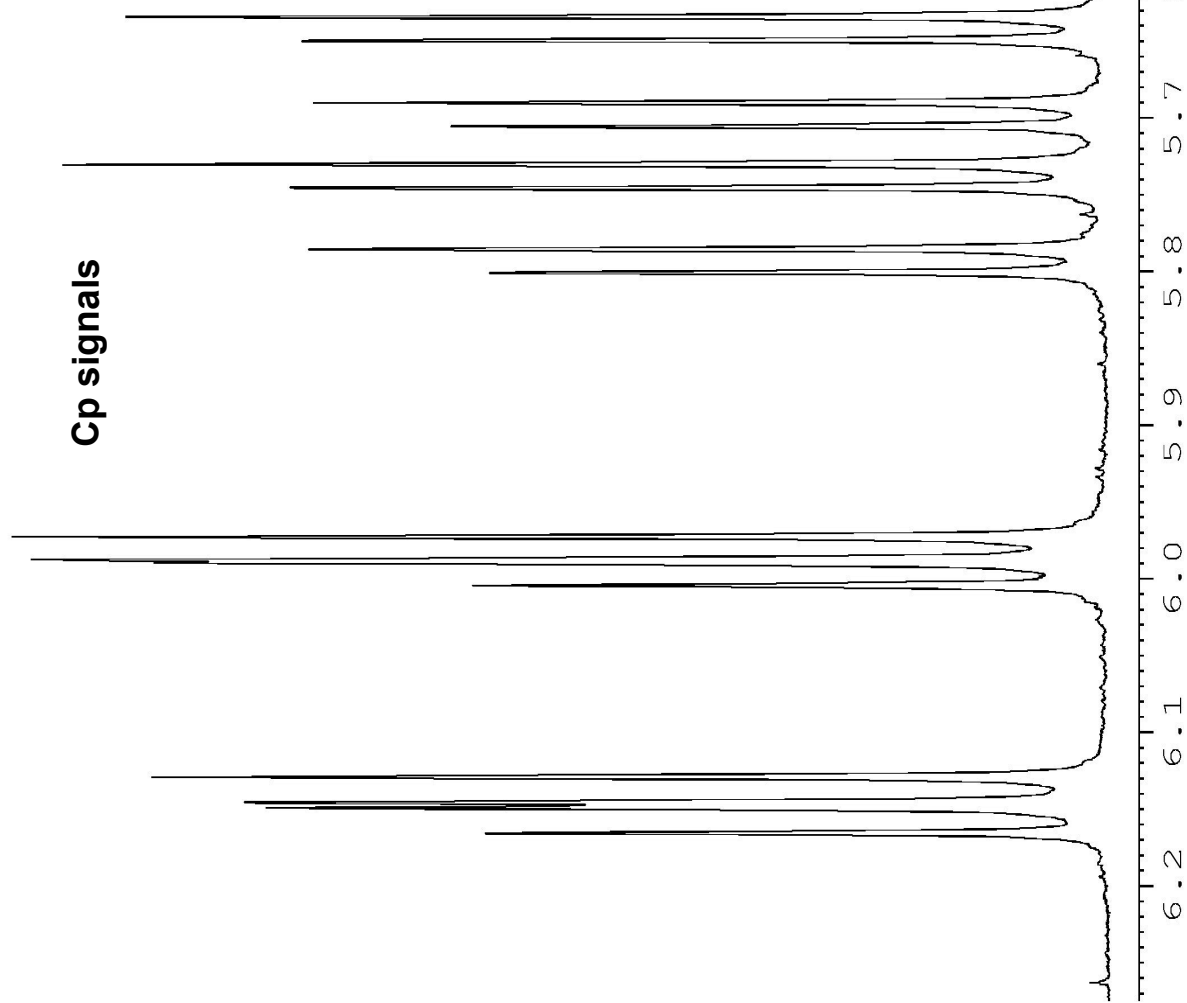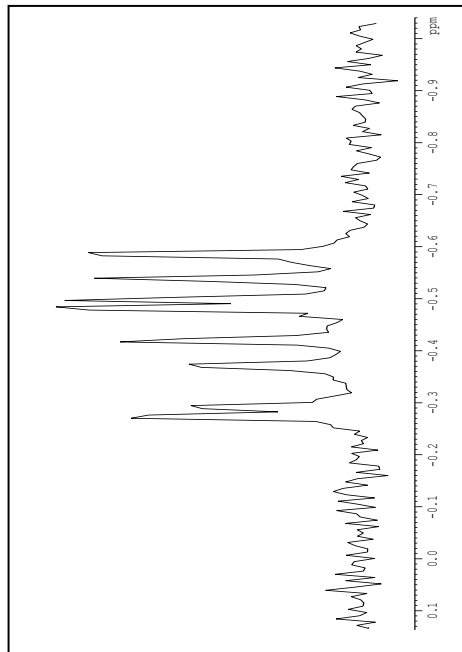

**$^{31}\text{P}\{^1\text{H}\}$  NMR Spectrum (202 MHz,  $\text{C}_6\text{D}_6$ , 300 K) of the mixture of complexes : 1a, 1b and 1c**

**CHR signals**

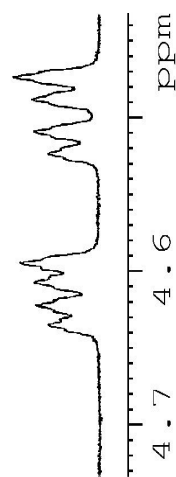

Temperature dependant  $^1\text{H}$  NMR Spectrum (500 MHz,  
Tol- $d_8$ ) of the mixture of complexes : 1a, 1b and 1c

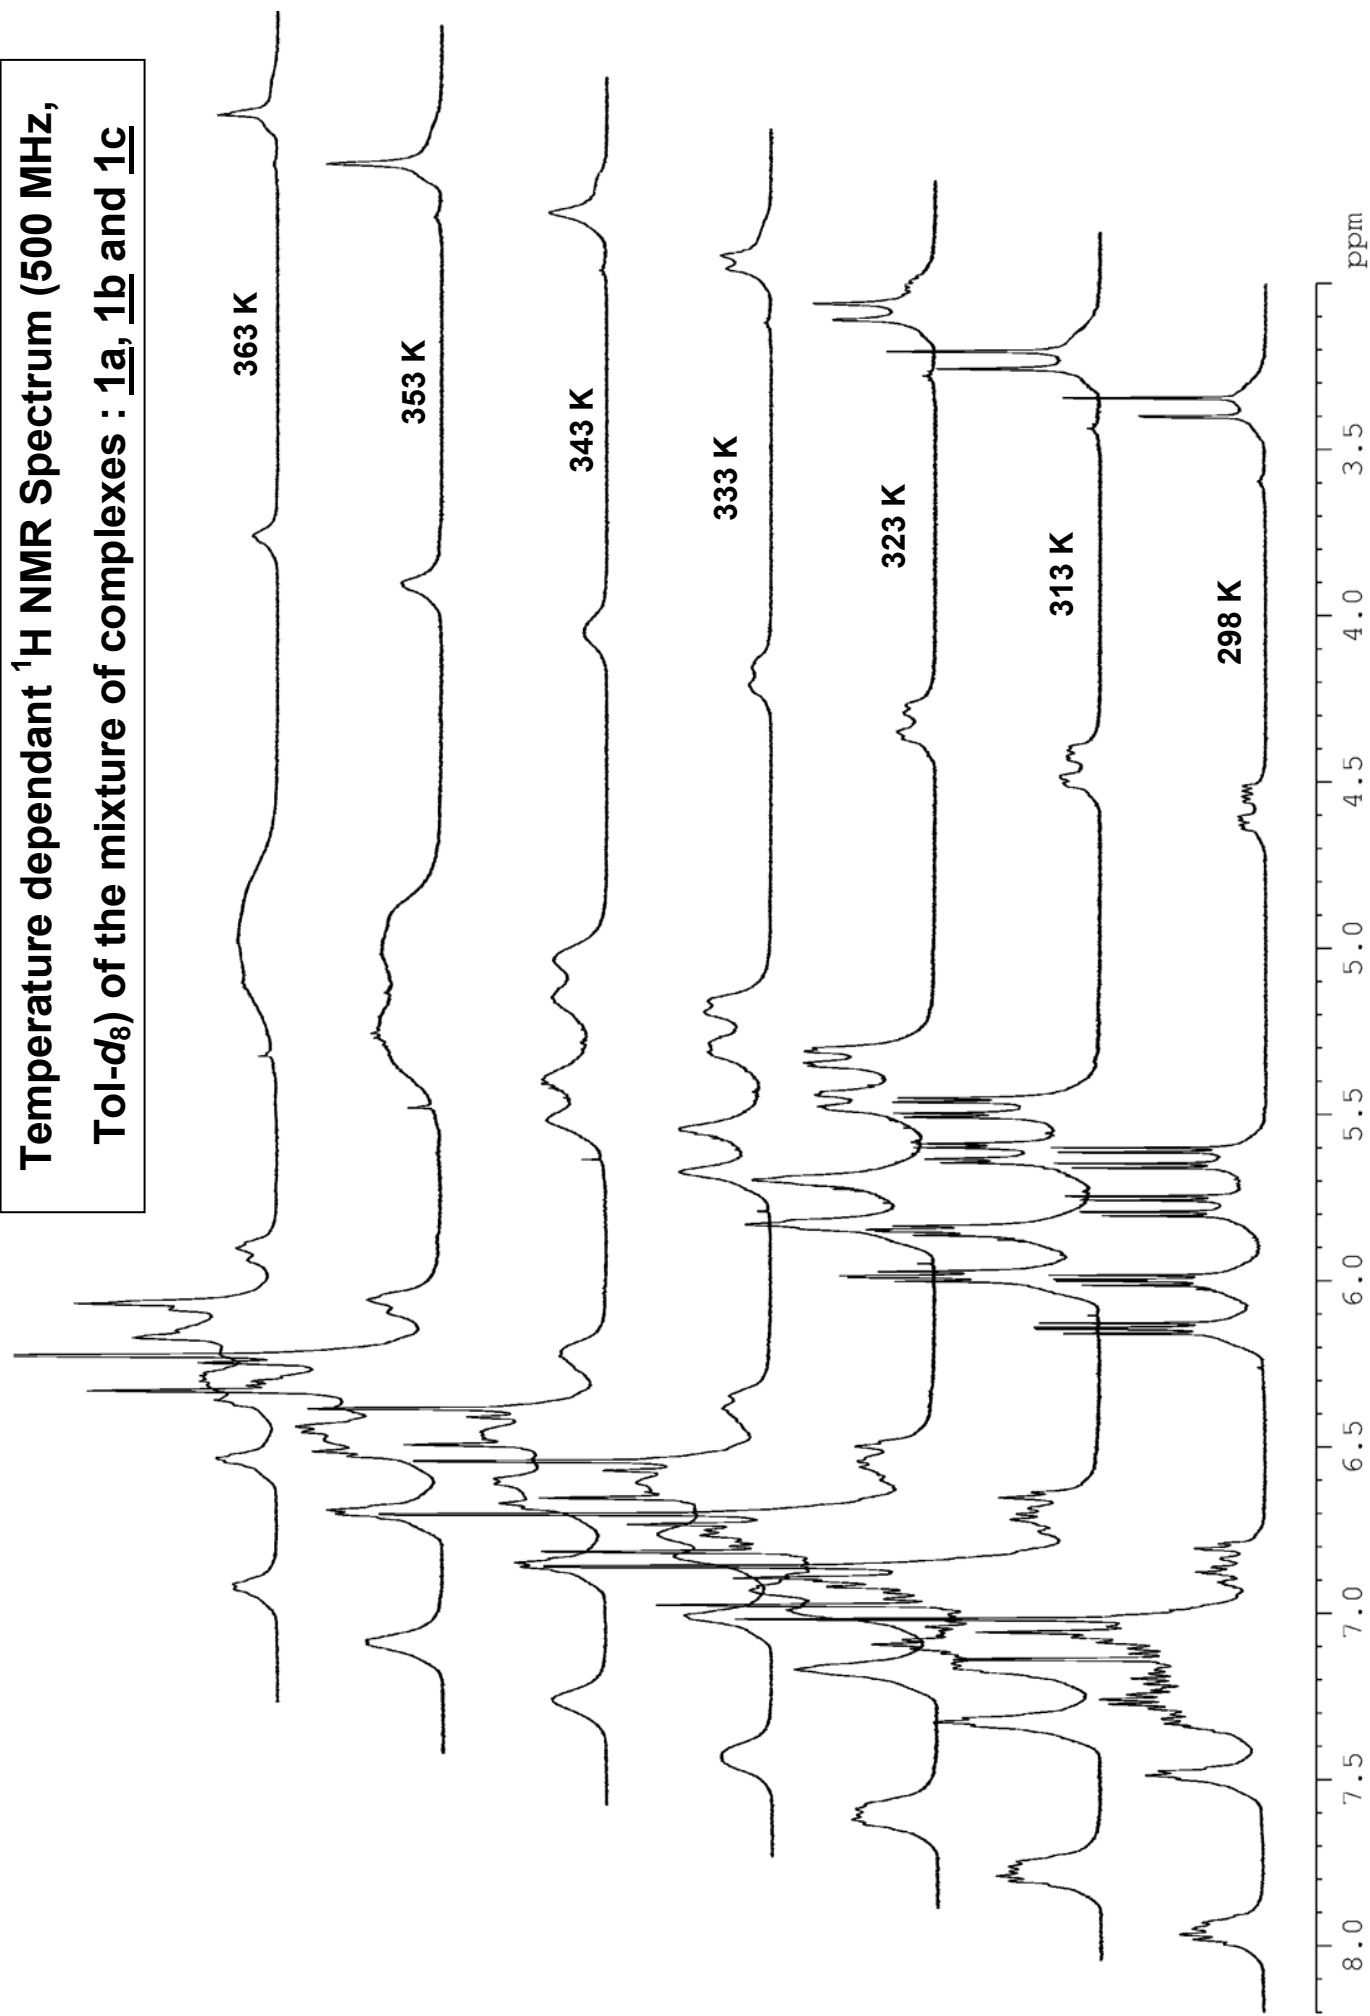

Supplement: b312954c.pdf [file b312954c.pdf]
